# Supplementary material
Source: HighWire-hosted journal article supplement (https://ez-admanager.com/highwire/filestream/136135/field_highwire_adjunct_files/0/Mazya__85__2098.pdf)
Supplement: Mazya__85__2098.pdf [file Mazya__85__2098.pdf]

# 重度和极重度缺血性卒中的静脉溶栓

## 结果来自于SITS-ISTR注册研究

Michael V. Mazya, MD, PhD; Kennedy R. Lees, MD, FRCP; David Collas, BSc, MBBS, FRCP;  
Viiu-Marika Rand, MD; Robert Mikulik, MD, PhD; Danilo Toni, MD, PhD;  
Nils Wahlgren, MD, PhD; Niaz Ahmed, MD, PhD

**目的：**旨在评估静脉溶栓超适应症用于治疗极重度卒中患者 [美国国立卫生研究院卒中评价量表(NIHSS) 评分 >25] 与符合欧洲指南的用于治疗重度卒中患者(NIHSS 评分为 15 ~ 25)的安全性。

**方法：**分析数据来自参加了卒中溶栓安全监测(Safe Implementation of Thrombolysis in Stroke, SITS)国际卒中溶栓登记库(2002 - 2013 年)的 793 家医院的 57,247 例接受了 IV 组织型纤溶酶原激活物的急性缺血性卒中患者。868 例(1.5%)患者 NIHSS 评分 >25, 19,995 例(34.9%)患者 NIHSS 评分为 15 ~ 25。结局指标包括脑实质出血、症状性颅内出血、死亡率和功能结局。

**结果：**极重度和重度卒中患者的脑实质出血发生率分别为 10.7% 和 11.0% ( $p = 0.79$ ), 根据 SITS-MOST(SITS - 监测研究)症状性颅内出血的发生率分别为 1.4% 和 2.5% ( $p = 0.052$ ), 3 个月死亡率分别为 50.4% 和 26.9% ( $p < 0.001$ ), 3 个月的功能独立分别为 14.0% 和 29% ( $p < 0.001$ )。多因素校正并未改变单因素对照的结果。极重度组后循环卒中的患者比例更高(36.2% vs 7.4%,  $p < 0.001$ ), 入院时反应迟钝或昏迷的患者比例也更高(58.4% vs 7.1%,  $p < 0.001$ )。极重度卒中纽约 26.2% 的患者是在症状发作后 3 小时以上才开始接受治疗, 而重度卒中组只有 14.5%。

**结论：**研究结果显示, NIHSS 评分 >25 的患者与 NIHSS 评分为 15 ~ 25 的患者相比并无颅内出血的超额风险, 这提示欧洲指南把 NIHSS >25 分视为 IV 组织型纤溶酶原激活物的禁忌证之一可能是不恰当的。NIHSS 评分 >25 分的患者死亡率增加, 功能独立率降低, 很可能是因为卒中本身更严重、因后循环缺血入院时存在意识障碍以及更长时间的治疗延迟。 *Neurology*® 2015;85:2098–2016
